# Supplementary material for: Epigenome-wide association study of serum cotinine in current smokers reveals novel genetically driven loci
Source: Clin Epigenetics. 2019 Jan 5;11:1. doi: 10.1186/s13148-018-0606-9 (PMC6321663; doi:10.1186/s13148-018-0606-9)
Supplement: Supplementary file 3 — Table S2. SNPs in the 40 top genes significantly associated (FDR p < 0.05) with cotinine levels. (XLS 14 kb) [file 13148_2018_606_MOESM3_ESM.xls]

## Sheet: Table S2
Table S2 SNPs in the 40 top genes significantly associated (FDR p<0.05) with cotinine levels.
SNP	GENE	CHR	Position	A1	A2	minor allele	major allele	MAF	Beta	SE	T	P	FDR	SNP annotation	EXON	INTRON	Variance explained
rs575461825	GNG12-AS1	1	68336284	T	C	C	T	0.0032895	-478.594	107.091	-4.46904	1.11125e-05	0.025836	intron_variant	-	1/8	0.0630924
rs112902461	PDCD6	5	304036	C	T	T	C	0.0032895	-478.594	107.091	-4.46904	1.11125e-05	0.025836	intron_variant	-	2/5	0.0630924
rs200247095	RN7SL207P	7	145789971	AT	A	A	AT	0.0032895	-478.594	107.091	-4.46904	1.11125e-05	0.025836	upstream_gene_variant	-	-	0.0630924
rs533354236	CNTNAP2	7	146284916	G	A	A	G	0.0032895	-478.594	107.091	-4.46904	1.11125e-05	0.025836	intron_variant	-	1/23	0.0630924
rs189183816	CNTNAP2	7	146437191	G	T	T	G	0.0032895	-478.594	107.091	-4.46904	1.11125e-05	0.025836	intron_variant	-	1/23	0.0630924
rs10231705	CNTNAP2	7	146475602	A	G	G	A	0.0032895	-478.594	107.091	-4.46904	1.11125e-05	0.025836	intron_variant	-	2/23	0.0630924
rs181755496	CNTNAP2	7	146625330	A	C	C	A	0.0032895	-478.594	107.091	-4.46904	1.11125e-05	0.025836	intron_variant	-	3/23	0.0630924
rs187105871	CNTNAP2	7	146646000	G	A	A	G	0.0032895	-478.594	107.091	-4.46904	1.11125e-05	0.025836	intron_variant	-	3/23	0.0630924
rs567037554	CNTNAP2	7	146810104	G	A	A	G	0.0032895	-478.594	107.091	-4.46904	1.11125e-05	0.025836	intron_variant	-	5/23	0.0630924
rs118107831	CNTNAP2	7	147339711	A	G	G	A	0.0032895	-478.594	107.091	-4.46904	1.11125e-05	0.025836	intron_variant	-	13/23	0.0630924
rs187857429	CNTNAP2	7	147778200	A	G	G	A	0.0032895	-478.594	107.091	-4.46904	1.11125e-05	0.025836	intron_variant	-	15/23	0.0630924
rs551800529	CNTNAP2	7	147817508	G	C	C	G	0.0032895	-478.594	107.091	-4.46904	1.11125e-05	0.025836	intron_variant	-	16/23	0.0630924
rs540204705	CNTNAP2	7	147879487	T	G	G	T	0.0032895	-478.594	107.091	-4.46904	1.11125e-05	0.025836	intron_variant	-	18/23	0.0630924
rs117254538	-	10	96395367	C	A	A	C	0.0032895	-478.594	107.091	-4.46904	1.11125e-05	0.025836	intergenic_variant	-	-	0.0630924
rs563714936	CYP2C18	10	96450248	T	C	C	T	0.0032895	-478.594	107.091	-4.46904	1.11125e-05	0.025836	intron_variant	-	3/8	0.0630924
rs561704327	ABTB2	11	34194018	T	C	C	T	0.0032895	-478.594	107.091	-4.46904	1.11125e-05	0.025836	intron_variant	-	4/16	0.0630924
rs565097636	MS4A10	11	60568413	A	C	C	A	0.0032895	-478.594	107.091	-4.46904	1.11125e-05	0.025836	3_prime_UTR_variant	8/8	-	0.0630924
rs532712997	THSD4	15	71609542	A	T	T	A	0.0032895	-478.594	107.091	-4.46904	1.11125e-05	0.025836	intron_variant	-	5/16	0.0630924
rs35212369	THSD4	15	71908704	T	TAC	TAC	T	0.0032895	-478.594	107.091	-4.46904	1.11125e-05	0.025836	intron_variant	-	6/16	0.0630924
rs187669467	ARHGAP44	17	12822733	C	T	T	C	0.0082237	-293.197	62.3716	-4.70082	3.93942e-06	0.025836	intron_variant	-	5/21	0.0662331
SNP, single nucleotide polymorphism
CHR, chromosome
A1/A2, Allele1/Allele2
MAF, minor allele frequency
SE, standard error
T, T-statistics
P, P-value
