# Supplementary material for: Epigenome-wide association study of serum cotinine in current smokers reveals novel genetically driven loci
Source: Clin Epigenetics. 2019 Jan 5;11:1. doi: 10.1186/s13148-018-0606-9 (PMC6321663; doi:10.1186/s13148-018-0606-9)
Supplement: Supplementary file 5 — Table S3. Cis acting methylation quantitative trait loci in the 40 genes highlighted in the EWAS. (XLS 31 kb) [file 13148_2018_606_MOESM5_ESM.xls]

## Sheet: Table S3
Table S3 Cis acting methylation quantitative trait loci in the 40 genes highlighted in the EWAS
SNP	SNP_Chr	SNP_Gene	CpG	CpG_Gene	CpG_Chr	beta	statistic	pvalue	FDR
rs532712997	15	THSD4	cg26589665	THSD4	15	0.0675751	5.50415	8.83317e-08	0.000192097
rs35212369	15	THSD4	cg26589665	THSD4	15	0.0675751	5.50415	8.83317e-08	0.000192097
rs112902461	5	AHRR	cg21161138	AHRR	5	0.0675751	5.50415	8.83317e-08	0.000192097
rs112902461	5	AHRR	cg25648203	AHRR	5	0.0675751	5.50415	8.83317e-08	0.000192097
rs561704327	11	ABTB2	cg05335388	ABTB2	11	0.0675751	5.50415	8.83317e-08	0.000192097
rs112902461	5	AHRR	cg11902777	AHRR	5	0.0675751	5.50415	8.83317e-08	0.000192097
rs200247095	7	CNTNAP2	cg21322436	CNTNAP2	7	0.0675751	5.50415	8.83317e-08	0.000192097
rs533354236	7	CNTNAP2	cg21322436	CNTNAP2	7	0.0675751	5.50415	8.83317e-08	0.000192097
rs189183816	7	CNTNAP2	cg21322436	CNTNAP2	7	0.0675751	5.50415	8.83317e-08	0.000192097
rs10231705	7	CNTNAP2	cg21322436	CNTNAP2	7	0.0675751	5.50415	8.83317e-08	0.000192097
rs181755496	7	CNTNAP2	cg21322436	CNTNAP2	7	0.0675751	5.50415	8.83317e-08	0.000192097
rs187105871	7	CNTNAP2	cg21322436	CNTNAP2	7	0.0675751	5.50415	8.83317e-08	0.000192097
rs567037554	7	CNTNAP2	cg21322436	CNTNAP2	7	0.0675751	5.50415	8.83317e-08	0.000192097
rs118107831	7	CNTNAP2	cg21322436	CNTNAP2	7	0.0675751	5.50415	8.83317e-08	0.000192097
rs187857429	7	CNTNAP2	cg21322436	CNTNAP2	7	0.0675751	5.50415	8.83317e-08	0.000192097
rs551800529	7	CNTNAP2	cg21322436	CNTNAP2	7	0.0675751	5.50415	8.83317e-08	0.000192097
rs540204705	7	CNTNAP2	cg21322436	CNTNAP2	7	0.0675751	5.50415	8.83317e-08	0.000192097
rs112902461	5	AHRR	cg05575921	AHRR	5	0.0675751	5.50415	8.83318e-08	0.000192097
rs112902461	5	AHRR	cg26703534	AHRR	5	0.0675751	5.50415	8.83318e-08	0.000192097
rs575461825	1	GNG12	cg25189904	GNG12	1	0.0675751	5.50415	8.83318e-08	0.000192097
rs117254538	10	CYP2C18	cg05992400	CYP2C18	10	0.0675751	5.50415	8.83318e-08	0.000192097
rs563714936	10	CYP2C18	cg05992400	CYP2C18	10	0.0675751	5.50415	8.83318e-08	0.000192097
rs565097636	11	PTGDR2	cg19254163	PTGDR2	11	0.0675751	5.50415	8.83318e-08	0.000192097
rs112902461	5	AHRR	cg14817490	AHRR	5	0.0675751	5.50415	8.83318e-08	0.000192097
rs112902461	5	AHRR	cg24090911	AHRR	5	0.0675751	5.50415	8.83318e-08	0.000192097
rs200247095	7	CNTNAP2	cg25949550	CNTNAP2	7	0.0675751	5.50415	8.83318e-08	0.000192097
rs533354236	7	CNTNAP2	cg25949550	CNTNAP2	7	0.0675751	5.50415	8.83318e-08	0.000192097
rs189183816	7	CNTNAP2	cg25949550	CNTNAP2	7	0.0675751	5.50415	8.83318e-08	0.000192097
rs10231705	7	CNTNAP2	cg25949550	CNTNAP2	7	0.0675751	5.50415	8.83318e-08	0.000192097
rs181755496	7	CNTNAP2	cg25949550	CNTNAP2	7	0.0675751	5.50415	8.83318e-08	0.000192097
rs187105871	7	CNTNAP2	cg25949550	CNTNAP2	7	0.0675751	5.50415	8.83318e-08	0.000192097
rs567037554	7	CNTNAP2	cg25949550	CNTNAP2	7	0.0675751	5.50415	8.83318e-08	0.000192097
rs118107831	7	CNTNAP2	cg25949550	CNTNAP2	7	0.0675751	5.50415	8.83318e-08	0.000192097
rs187857429	7	CNTNAP2	cg25949550	CNTNAP2	7	0.0675751	5.50415	8.83318e-08	0.000192097
rs551800529	7	CNTNAP2	cg25949550	CNTNAP2	7	0.0675751	5.50415	8.83318e-08	0.000192097
rs540204705	7	CNTNAP2	cg25949550	CNTNAP2	7	0.0675751	5.50415	8.83318e-08	0.000192097
rs190522906	8	MTSS1	cg25305703	CASC8	8	0.0112075	4.97995	1.15515e-06	0.00237992
rs190522906	8	MTSS1	cg24838345	MTSS1	8	0.0112075	4.97995	1.15515e-06	0.00237992
rs374147895	5	AHRR	cg11902777	AHRR	5	-0.0342962	-4.73114	3.65447e-06	0.00325124
rs375697271	5	AHRR	cg11902777	AHRR	5	-0.0342962	-4.73114	3.65447e-06	0.00325124
rs144645498	5	AHRR	cg11902777	AHRR	5	-0.0342962	-4.73114	3.65447e-06	0.00325124
rs184369560	3	SEMA5B	cg02306995	SEMA5B	3	-0.0342962	-4.73114	3.65447e-06	0.00325124
rs187102886	3	SEMA5B	cg02306995	SEMA5B	3	-0.0342962	-4.73114	3.65447e-06	0.00325124
rs374147895	5	AHRR	cg21161138	AHRR	5	-0.0342962	-4.73114	3.65447e-06	0.00325124
rs375697271	5	AHRR	cg21161138	AHRR	5	-0.0342962	-4.73114	3.65447e-06	0.00325124
rs144645498	5	AHRR	cg21161138	AHRR	5	-0.0342962	-4.73114	3.65447e-06	0.00325124
rs141550316	16	GNG13	cg05361530	GNG13	16	-0.0342962	-4.73114	3.65447e-06	0.00325124
rs139951304	16	GNG13	cg05361530	GNG13	16	-0.0342962	-4.73114	3.65447e-06	0.00325124
rs150535361	16	GNG13	cg05361530	GNG13	16	-0.0342962	-4.73114	3.65447e-06	0.00325124
rs147491946	16	GNG13	cg05361530	GNG13	16	-0.0342962	-4.73114	3.65447e-06	0.00325124
rs147163457	16	GNG13	cg05361530	GNG13	16	-0.0342962	-4.73114	3.65447e-06	0.00325124
rs111320887	16	GNG13	cg05361530	GNG13	16	-0.0342962	-4.73114	3.65447e-06	0.00325124
rs7202134	16	GNG13	cg05361530	GNG13	16	-0.0342962	-4.73114	3.65447e-06	0.00325124
rs73493245	16	GNG13	cg05361530	GNG13	16	-0.0342962	-4.73114	3.65447e-06	0.00325124
rs111680125	16	GNG13	cg05361530	GNG13	16	-0.0342962	-4.73114	3.65447e-06	0.00325124
rs112238350	16	GNG13	cg05361530	GNG13	16	-0.0342962	-4.73114	3.65447e-06	0.00325124
rs111636332	16	GNG13	cg05361530	GNG13	16	-0.0342962	-4.73114	3.65447e-06	0.00325124
rs374147895	5	AHRR	cg24090911	AHRR	5	-0.0342962	-4.73114	3.65447e-06	0.00325124
rs375697271	5	AHRR	cg24090911	AHRR	5	-0.0342962	-4.73114	3.65447e-06	0.00325124
rs144645498	5	AHRR	cg24090911	AHRR	5	-0.0342962	-4.73114	3.65447e-06	0.00325124
rs144126726	7	CNTNAP2	cg21322436	CNTNAP2	7	-0.0342962	-4.73114	3.65447e-06	0.00325124
rs190080760	7	CNTNAP2	cg21322436	CNTNAP2	7	-0.0342962	-4.73114	3.65447e-06	0.00325124
rs150383431	7	CNTNAP2	cg21322436	CNTNAP2	7	-0.0342962	-4.73114	3.65447e-06	0.00325124
rs190786382	7	CNTNAP2	cg21322436	CNTNAP2	7	-0.0342962	-4.73114	3.65447e-06	0.00325124
rs530617616	7	CNTNAP2	cg21322436	CNTNAP2	7	-0.0342962	-4.73114	3.65447e-06	0.00325124
rs569576643	7	CNTNAP2	cg21322436	CNTNAP2	7	-0.0342962	-4.73114	3.65447e-06	0.00325124
rs77943326	7	CNTNAP2	cg21322436	CNTNAP2	7	-0.0342962	-4.73114	3.65447e-06	0.00325124
rs143121597	8	MTSS1	cg24838345	MTSS1	8	-0.0342962	-4.73114	3.65447e-06	0.00325124
rs374147895	5	AHRR	cg26703534	AHRR	5	-0.0342962	-4.73114	3.65447e-06	0.00325124
rs375697271	5	AHRR	cg26703534	AHRR	5	-0.0342962	-4.73114	3.65447e-06	0.00325124
rs144645498	5	AHRR	cg26703534	AHRR	5	-0.0342962	-4.73114	3.65447e-06	0.00325124
rs374147895	5	AHRR	cg25648203	AHRR	5	-0.0342962	-4.73114	3.65447e-06	0.00325124
rs375697271	5	AHRR	cg25648203	AHRR	5	-0.0342962	-4.73114	3.65447e-06	0.00325124
rs144645498	5	AHRR	cg25648203	AHRR	5	-0.0342962	-4.73114	3.65447e-06	0.00325124
rs143121597	8	MTSS1	cg25305703	CASC8	8	-0.0342962	-4.73114	3.65447e-06	0.00325124
rs374147895	5	AHRR	cg14817490	AHRR	5	-0.0342962	-4.73114	3.65447e-06	0.00325124
rs375697271	5	AHRR	cg14817490	AHRR	5	-0.0342962	-4.73114	3.65447e-06	0.00325124
rs144645498	5	AHRR	cg14817490	AHRR	5	-0.0342962	-4.73114	3.65447e-06	0.00325124
rs374147895	5	AHRR	cg05575921	AHRR	5	-0.0342962	-4.73114	3.65447e-06	0.00325124
rs375697271	5	AHRR	cg05575921	AHRR	5	-0.0342962	-4.73114	3.65447e-06	0.00325124
rs144645498	5	AHRR	cg05575921	AHRR	5	-0.0342962	-4.73114	3.65447e-06	0.00325124
rs144126726	7	CNTNAP2	cg25949550	CNTNAP2	7	-0.0342962	-4.73114	3.65447e-06	0.00325124
rs190080760	7	CNTNAP2	cg25949550	CNTNAP2	7	-0.0342962	-4.73114	3.65447e-06	0.00325124
rs150383431	7	CNTNAP2	cg25949550	CNTNAP2	7	-0.0342962	-4.73114	3.65447e-06	0.00325124
rs190786382	7	CNTNAP2	cg25949550	CNTNAP2	7	-0.0342962	-4.73114	3.65447e-06	0.00325124
rs530617616	7	CNTNAP2	cg25949550	CNTNAP2	7	-0.0342962	-4.73114	3.65447e-06	0.00325124
rs569576643	7	CNTNAP2	cg25949550	CNTNAP2	7	-0.0342962	-4.73114	3.65447e-06	0.00325124
rs77943326	7	CNTNAP2	cg25949550	CNTNAP2	7	-0.0342962	-4.73114	3.65447e-06	0.00325124
rs115867861	15	THSD4	cg26589665	THSD4	15	-0.0181962	-4.72324	3.78783e-06	0.00325878
rs28594578	15	THSD4	cg26589665	THSD4	15	-0.0181962	-4.72324	3.78783e-06	0.00325878
rs565276097	15	THSD4	cg26589665	THSD4	15	-0.0181962	-4.72324	3.78783e-06	0.00325878
rs117115339	15	THSD4	cg26589665	THSD4	15	0.0143756	4.71127	3.9987e-06	0.00336621
rs138597027	15	THSD4	cg26589665	THSD4	15	0.0143756	4.71127	3.9987e-06	0.00336621
rs149545162	7	CNTNAP2	cg25949550	CNTNAP2	7	-0.0240901	-4.65837	5.07447e-06	0.00397214
rs201782987	7	CNTNAP2	cg25949550	CNTNAP2	7	-0.0240901	-4.65837	5.07447e-06	0.00397214
rs149545162	7	CNTNAP2	cg21322436	CNTNAP2	7	-0.0240901	-4.65837	5.07447e-06	0.00397214
rs201782987	7	CNTNAP2	cg21322436	CNTNAP2	7	-0.0240901	-4.65837	5.07447e-06	0.00397214
rs117774851	7	CNTNAP2	cg21322436	CNTNAP2	7	-0.0135233	-4.65619	5.12435e-06	0.00397214
rs144242797	7	CNTNAP2	cg21322436	CNTNAP2	7	-0.0135233	-4.65619	5.12435e-06	0.00397214
rs117774851	7	CNTNAP2	cg25949550	CNTNAP2	7	-0.0135233	-4.65619	5.12435e-06	0.00397214
rs144242797	7	CNTNAP2	cg25949550	CNTNAP2	7	-0.0135233	-4.65619	5.12435e-06	0.00397214
rs80114656	15	THSD4	cg26589665	THSD4	15	-0.00582115	-4.62008	6.02172e-06	0.00462196
rs12441628	15	THSD4	cg26589665	THSD4	15	-0.00321746	-4.57345	7.40632e-06	0.00562952
rs55865605	8	MTSS1	cg24838345	MTSS1	8	-0.0119452	-4.50803	9.87405e-06	0.00736228
rs55865605	8	MTSS1	cg25305703	CASC8	8	-0.0119452	-4.50803	9.87405e-06	0.00736228
rs6429291	1	OPN3	cg26687670	OPN3	1	-0.00259803	-4.27982	2.62553e-05	0.0193918
rs2286128	7	CNTNAP2	cg21322436	CNTNAP2	7	-0.0199164	-4.25641	2.89598e-05	0.0209932
rs2286128	7	CNTNAP2	cg25949550	CNTNAP2	7	-0.0199164	-4.25641	2.89598e-05	0.0209932
rs72759657	15	THSD4	cg26589665	THSD4	15	0.00573732	4.24024	3.09827e-05	0.0220512
rs72759662	15	THSD4	cg26589665	THSD4	15	0.00573732	4.24024	3.09827e-05	0.0220512
rs10094871	8	CASC8	cg25305703	CASC8	8	0.00328795	4.23026	3.2297e-05	0.0227796
rs186691659	4	MSX1	cg04776445	MSX1	4	-0.0102409	-4.22485	3.30321e-05	0.0230901
rs28489376	8	CASC8	cg25305703	CASC8	8	0.00299064	4.18178	3.94774e-05	0.0273512
rs144262710	5	VTRNA1-1	cg16179182	VTRNA1-1	5	-0.0045869	-4.17484	4.06226e-05	0.0276552
rs79094127	5	VTRNA1-1	cg16179182	VTRNA1-1	5	-0.0045869	-4.17484	4.06226e-05	0.0276552
rs9330381	7	PDGFA	cg05469934	PDGFA	7	0.0124794	4.17268	4.0986e-05	0.027662
rs28711896	15	THSD4	cg26589665	THSD4	15	0.00379046	4.15216	4.45896e-05	0.0298369
rs35697671	15	THSD4	cg26589665	THSD4	15	0.00383499	4.12459	4.99109e-05	0.0331146
rs148532451	15	THSD4	cg26589665	THSD4	15	-0.0104153	-4.1088	5.32256e-05	0.0350171
rs35983033	5	VTRNA1-1	cg16179182	VTRNA1-1	5	-0.00454588	-4.06846	6.26749e-05	0.0402198
rs17119056	5	VTRNA1-1	cg16179182	VTRNA1-1	5	-0.00454588	-4.06846	6.26749e-05	0.0402198
rs113642240	5	VTRNA1-1	cg16179182	VTRNA1-1	5	-0.00454588	-4.06846	6.26749e-05	0.0402198
rs80220466	8	MTSS1	cg24838345	MTSS1	8	-0.00908207	-4.02485	7.4676e-05	0.0471482
rs80220466	8	MTSS1	cg25305703	CASC8	8	-0.00908207	-4.02485	7.4676e-05	0.0471482
SNP_Chr, chromosome corresponding to SNP
SNP_Gene, Gene corresponding to SNP
CpG_Gene, Gene corresponding to CpG
CpG_Chr, Chromosome corresponding to CpG
FDR, False discovery rate
