# Supplementary material for: Epigenome-wide association study of serum cotinine in current smokers reveals novel genetically driven loci
Source: Clin Epigenetics. 2019 Jan 5;11:1. doi: 10.1186/s13148-018-0606-9 (PMC6321663; doi:10.1186/s13148-018-0606-9)
Supplement: Supplementary file 8 — Table S5. Mediation analysis omnibus P values for the 19 meQTLs associated with serum cotinine levels. (XLS 33 kb) [file 13148_2018_606_MOESM8_ESM.xls]

## Sheet: Table S5
Table S5. Mediation analysis omnibus P-values for the 19 meQTLs associated with serum cotinine levels
					GNG12-AS1	PDCD6	RN7SL207P	CNTNAP2	CNTNAP2	CNTNAP2	CNTNAP2	CNTNAP2	CNTNAP2	CNTNAP2	CNTNAP2	CNTNAP2	CNTNAP2	-	CYP2C18	ABTB2	MS4A10	THSD4	THSD4
					chr1:68336284	chr5:304036	chr7:145789971	chr7:146284916	chr7:146437191	chr7:146475602	chr7:146625330	chr7:146646000	chr7:146810104	chr7:147339711	chr7:147778200	chr7:147817508	chr7:147879487	chr10:96395367	chr10:96450248	chr11:34194018	chr11:60568413	chr15:71609542	chr15:71908704
CpG	CHR	Gene	Probe start	Probe end	rs575461825	rs112902461	rs200247095	rs533354236	rs189183816	rs10231705	rs181755496	rs187105871	rs567037554	rs118107831	rs187857429	rs551800529	rs540204705	rs117254538	rs563714936	rs561704327	rs565097636	rs532712997	rs35212369
cg25189904	1	GNG12	67833810	67833811	0.98791	0.886322	0.959436	0.981872	0.958258	0.958979	0.932955	0.902351	0.960286	0.955116	0.976569	0.933315	0.93471	0.95325	0.965915	0.991915	0.876184	0.880301	0.956485
cg21033965	1	CLEC20A	178486665	178486666	0.278671	0.278299	0.361977	0.343646	0.310862	0.382662	0.289986	0.261432	0.239732	0.312492	0.239732	0.319649	0.305896	0.365247	0.365232	0.351221	0.293485	0.272053	0.323971
cg26687670	1	OPN3	241641637	241641638	0.157008	0.130913	0.221208	0.172831	0.203935	0.156477	0.0945028	0.162736	0.292715	0.239244	0.206254	0.226579	0.114561	0.195362	0.165845	0.165708	0.218259	0.136781	0.147707
cg27241845	2	ALPP	232385660	232385661	0.141587	0.141587	0.141587	0.141587	0.141587	0.141587	0.141587	0.141587	0.141587	0.141587	0.141587	0.141587	0.141587	0.141587	0.141587	0.141587	0.141587	0.141587	0.141587
cg03329539	2	ALPPL2	232418619	232418620	0.324218	0.324218	0.324218	0.324218	0.324218	0.324218	0.324218	0.324218	0.324218	0.324218	0.324218	0.324218	0.324218	0.324218	0.324218	0.324218	0.324218	0.324218	0.324218
cg06644428	2	ALPPL2	232419402	232419403	0.688137	0.688137	0.688137	0.688137	0.688137	0.688137	0.688137	0.688137	0.688137	0.688137	0.688137	0.688137	0.688137	0.688137	0.688137	0.688137	0.688137	0.688137	0.688137
cg05951221	2	ALPPL2	232419692	232419693	0.769543	0.769543	0.769543	0.769543	0.769543	0.769543	0.769543	0.769543	0.769543	0.769543	0.769543	0.769543	0.769543	0.769543	0.769543	0.769543	0.769543	0.769543	0.769543
cg21566642	2	ALPPL2	232419951	232419952	0.727539	0.727539	0.727539	0.727539	0.727539	0.727539	0.727539	0.727539	0.727539	0.727539	0.727539	0.727539	0.727539	0.727539	0.727539	0.727539	0.727539	0.727539	0.727539
cg01940273	2	ALPPL2	232420224	232420225	0.461424	0.461424	0.461424	0.461424	0.461424	0.461424	0.461424	0.461424	0.461424	0.461424	0.461424	0.461424	0.461424	0.461424	0.461424	0.461424	0.461424	0.461424	0.461424
cg13193840	2	ALPPL2	232420579	232420580	0.440585	0.440585	0.440585	0.440585	0.440585	0.440585	0.440585	0.440585	0.440585	0.440585	0.440585	0.440585	0.440585	0.440585	0.440585	0.440585	0.440585	0.440585	0.440585
cg02306995	3	SEMA5B	122916202	122916203	0.447009	0.447009	0.447009	0.447009	0.447009	0.447009	0.447009	0.447009	0.447009	0.447009	0.447009	0.447009	0.447009	0.447009	0.447009	0.447009	0.447009	0.447009	0.447009
cg04776445	4	MSX1	4791365	4791366	0.405489	0.405489	0.405489	0.405489	0.405489	0.405489	0.405489	0.405489	0.405489	0.405489	0.405489	0.405489	0.405489	0.405489	0.405489	0.405489	0.405489	0.405489	0.405489
cg13740236	4	LSM6	146216892	146216893	0.0116773	0.0138847	0.0191178	0.00684064	0.0218075	0.00684064	0.0358507	0.0155613	0.0143374	0.00684064	0.0080031	0.012774	0.0110874	0.0162775	0.027777	0.00684064	0.0128927	0.00904274	0.00684064
cg11902777	5	AHRR	368728	368729	0.779925	0.779925	0.779925	0.779925	0.779925	0.779925	0.779925	0.779925	0.779925	0.779925	0.779925	0.779925	0.779925	0.779925	0.779925	0.779925	0.779925	0.779925	0.779925
cg01899089	5	AHRR	369854	369855	0.187999	0.311025	0.1984	0.187999	0.187999	0.187999	0.187999	0.219257	0.187999	0.20737	0.187999	0.187999	0.21493	0.187999	0.245419	0.187999	0.187999	0.212354	0.187999
cg05575921	5	AHRR	373263	373264	0.966416	0.966416	0.966416	0.966416	0.966416	0.966416	0.966416	0.966416	0.966416	0.966416	0.966416	0.966416	0.966416	0.966416	0.966416	0.966416	0.966416	0.966416	0.966416
cg26703534	5	AHRR	377243	377244	0.108543	0.108543	0.108543	0.108543	0.108543	0.108543	0.108543	0.108543	0.108543	0.108543	0.108543	0.108543	0.108543	0.108543	0.108543	0.108543	0.108543	0.108543	0.108543
cg14817490	5	AHRR	392805	392806	0.807478	0.784139	0.795549	0.879504	0.85433	0.81053	0.756124	0.864826	0.796727	0.808857	0.873576	0.809487	0.847502	0.753135	0.786282	0.751581	0.785681	0.756466	0.858422
cg25648203	5	AHRR	395329	395330	0.204283	0.204283	0.204283	0.204283	0.204283	0.204283	0.204283	0.204283	0.204283	0.204283	0.204283	0.204283	0.204283	0.204283	0.204283	0.204283	0.204283	0.204283	0.204283
cg21161138	5	AHRR	399245	399246	0.153507	0.153507	0.153507	0.153507	0.153507	0.153507	0.153507	0.153507	0.153507	0.153507	0.153507	0.153507	0.153507	0.153507	0.153507	0.153507	0.153507	0.153507	0.153507
cg24090911	5	AHRR	400617	400618	0.060798	0.060798	0.060798	0.060798	0.060798	0.060798	0.060798	0.060798	0.060798	0.060798	0.060798	0.060798	0.060798	0.060798	0.060798	0.060798	0.060798	0.060798	0.060798
cg10961758	5	EDIL3	83927009	83927010	0.11299	0.180182	0.0997013	0.143887	0.125253	0.0918268	0.254906	0.113327	0.104334	0.157834	0.195289	0.0988357	0.120375	0.0876903	0.263716	0.187268	0.267732	0.0979946	0.0833357
cg16179182	5	VTRNA1-1	140710819	140710820	0.189984	0.189984	0.189984	0.189984	0.189984	0.189984	0.189984	0.189984	0.189984	0.189984	0.189984	0.189984	0.189984	0.189984	0.189984	0.189984	0.189984	0.189984	0.189984
cg14580211	5	SMIM3	150781737	150781738	0.168237	0.168237	0.168237	0.168237	0.168237	0.168237	0.168237	0.168237	0.168237	0.168237	0.168237	0.168237	0.168237	0.168237	0.168237	0.168237	0.172329	0.168237	0.168237
cg06126421	6	IER3	30752303	30752304	0.703195	0.703195	0.703195	0.703195	0.703195	0.703195	0.703195	0.703195	0.703195	0.703195	0.703195	0.703195	0.703195	0.703195	0.703195	0.703195	0.703195	0.703195	0.703195
cg14753356	6	IER3	30752331	30752332	0.23282	0.23282	0.23282	0.23282	0.23282	0.23282	0.23282	0.23282	0.23282	0.23282	0.23282	0.23282	0.23282	0.23282	0.23282	0.23282	0.23282	0.23282	0.23282
cg22856972	6	TBPL1	133954040	133954041	0.963986	0.989351	0.993201	0.976562	0.975254	0.974086	0.995995	0.993065	0.996091	0.986752	0.978534	0.990636	0.981459	0.991673	0.978032	0.990619	0.983373	0.998745	0.96554
cg05469934	7	PDGFA	526830	526831	0.60937	0.60937	0.60937	0.60937	0.60937	0.642706	0.60937	0.60937	0.60937	0.60937	0.60937	0.60937	0.60937	0.60937	0.60937	0.60937	0.60937	0.64569	0.60937
cg09022230	7	TNRC18	5417594	5417595	0.0258796	0.0301864	0.0258796	0.0258796	0.0258796	0.055555	0.0258796	0.0258796	0.043633	0.0258796	0.0582867	0.0763726	0.0266436	0.0258796	0.0548584	0.0258796	0.0258796	0.0258796	0.0258796
cg21322436	7	CNTNAP2	146115750	146115751	0.62427	0.62427	0.62427	0.62427	0.62427	0.62427	0.62427	0.62427	0.62427	0.62427	0.62427	0.62427	0.62427	0.62427	0.62427	0.62427	0.62427	0.62427	0.62427
cg25949550	7	CNTNAP2	146117214	146117215	0.366002	0.366002	0.366002	0.366002	0.366002	0.366002	0.366002	0.366002	0.366002	0.366002	0.366002	0.366002	0.366002	0.366002	0.366002	0.366002	0.366002	0.366002	0.366002
cg09267815	8	YTHDF3	63470248	63470249	0.410778	0.410778	0.410778	0.410778	0.410778	0.410778	0.410778	0.410778	0.410778	0.410778	0.410778	0.410778	0.410778	0.410778	0.410778	0.410778	0.410778	0.410778	0.410778
cg22288066	8	NOV	119412178	119412179	0.73569	0.746609	0.689077	0.63585	0.672805	0.668531	0.677201	0.709532	0.742836	0.662824	0.740613	0.831771	0.593969	0.72914	0.717906	0.72644	0.660133	0.675623	0.616177
cg24838345	8	MTSS1	124725112	124725113	0.00354204	0.00192295	0.00200185	0.0165469	0.000375212	0.000354893	0.0052659	0.00145291	0.00119705	0.00256135	0.000657355	0.000312488	0.00217194	0.000252636	0.000923036	0.000906616	0.00266146	0.000874183	0.0051055
cg25305703	8	CASC8	127365972	127365973	0.0394039	0.0420099	0.0053845	0.0111763	0.0193926	0.00954007	0.0053845	0.0102982	0.0053845	0.00731515	0.0285485	0.00733762	0.00565289	0.0191008	0.00548695	0.0565689	0.0205001	0.00980057	0.0053845
cg01692968	9	SLC44A1	105243068	105243069	0.122613	0.112365	0.112365	0.168315	0.132452	0.116033	0.112365	0.112365	0.213436	0.112365	0.112365	0.134945	0.112365	0.120622	0.112365	0.112365	0.112365	0.112365	0.112365
cg14120703	9	NOTCH1	136521650	136521651	0.104319	0.104319	0.104319	0.10638	0.104319	0.104319	0.160424	0.104319	0.118161	0.139509	0.114594	0.152941	0.156399	0.104319	0.104979	0.115583	0.144486	0.115271	0.155592
cg05992400	10	CYP2C18	94623871	94623872	0.248713	0.347445	0.274078	0.32319	0.187023	0.256862	0.334174	0.29199	0.346512	0.211894	0.247208	0.36077	0.264047	0.283924	0.314017	0.247838	0.26022	0.228042	0.31708
cg16421726	10	ZRANB1	124940757	124940758	0.637912	0.715464	0.724216	0.605	0.69062	0.677887	0.679814	0.650754	0.699329	0.766903	0.592979	0.6766	0.664583	0.678187	0.621379	0.749311	0.644601	0.749639	0.720383
cg05335388	11	ABTB2	34396903	34396904	0.781851	0.866039	0.790215	0.829767	0.80557	0.804902	0.854886	0.848205	0.880816	0.860145	0.86081	0.85496	0.933589	0.942754	0.799047	0.859101	0.834424	0.874355	0.826469
cg19254163	11	PTGDR2	60856309	60856310	0.0255639	0.0915621	0.0448516	0.0534803	0.0519753	0.0325832	0.0557354	0.0250639	0.0316293	0.0651513	0.054791	0.0662191	0.0560642	0.0620288	0.0701558	0.060878	0.080397	0.0641418	0.0563266
cg21611682	11	LRP5	68370801	68370802	0.0791981	0.0791981	0.0791981	0.0791981	0.0791981	0.0791981	0.0791981	0.0791981	0.0791981	0.0791981	0.0791981	0.0791981	0.0791981	0.0791981	0.0791981	0.0791981	0.0791981	0.0791981	0.0791981
cg14624207	11	LRP5	68374730	68374731	0.221856	0.187795	0.187795	0.216317	0.187795	0.195019	0.191598	0.23884	0.187795	0.187795	0.252927	0.226425	0.21477	0.187795	0.187795	0.279832	0.187795	0.187795	0.187795
cg10788371	11	LRRC32	76669996	76669997	0.194619	0.149015	0.178729	0.176952	0.143642	0.19673	0.182967	0.143642	0.17461	0.145636	0.143642	0.143642	0.160179	0.154008	0.143642	0.174874	0.186164	0.143642	0.214593
cg11491407	12	CACNA2D4	1864706	1864707	0.820006	0.820006	0.820006	0.820006	0.820006	0.820006	0.820006	0.836419	0.820006	0.820006	0.820006	0.820006	0.820006	0.820006	0.820006	0.820006	0.820006	0.820006	0.820006
cg18443392	12	LRP1	57191188	57191189	0.711255	0.583298	0.606644	0.753033	0.582713	0.753522	0.71586	0.58089	0.613041	0.663041	0.671289	0.691847	0.729158	0.712886	0.639729	0.689072	0.70049	0.713949	0.766379
cg04524475	13	RNY1P5	74301834	74301835	0.448019	0.448019	0.448019	0.448019	0.448019	0.448019	0.448019	0.448019	0.448019	0.448019	0.448019	0.448019	0.448019	0.448019	0.448019	0.448019	0.448019	0.448019	0.448019
cg26589665	15	THSD4	71330951	71330952	0.0499342	0.0777334	0.0499342	0.0499342	0.0499342	0.0499342	0.0499342	0.0499342	0.0499342	0.0617599	0.0499342	0.0499342	0.0499342	0.0499342	0.0499342	0.0499342	0.0499342	0.0499342	0.0604406
cg05361530	16	GNG13	803349	803350	0.613521	0.763541	0.62892	0.702854	0.653914	0.676959	0.715036	0.754159	0.681282	0.666949	0.693571	0.680477	0.64088	0.67593	0.597939	0.628	0.660736	0.715407	0.680228
cg07991586	16	ADCY7	50245264	50245265	0.100921	0.132732	0.0715736	0.165204	0.110519	0.0914112	0.173989	0.112315	0.0720754	0.0711302	0.0819199	0.101777	0.219007	0.151279	0.0747996	0.0928735	0.116007	0.175128	0.093764
cg05460226	17	PIK3R5	8900962	8900963	0.140435	0.140435	0.140435	0.140435	0.140435	0.140435	0.140435	0.140435	0.140435	0.140435	0.144516	0.140435	0.140435	0.140435	0.140435	0.140435	0.140435	0.140435	0.140435
cg05396243	17	TMEM220-AS1	10804230	10804231	0.0226342	0.0578583	0.0226342	0.0226342	0.0485637	0.0461006	0.0226342	0.0275089	0.0523281	0.061932	0.0226342	0.0226342	0.0809224	0.0333607	0.0286519	0.0337985	0.0469358	0.0334496	0.0373797
cg07658936	17	ARHGAP44	12971580	12971581	0.890487	0.833225	0.830648	0.903822	0.837656	0.858743	0.796655	0.768222	0.795575	0.736199	0.924033	0.808693	0.861724	0.793345	0.822654	0.805465	0.767845	0.859318	0.816037
cg03636183	19	F2RL3	16889774	16889775	0.361053	0.361053	0.361053	0.361053	0.361053	0.361053	0.361053	0.361053	0.361053	0.361053	0.361053	0.361053	0.361053	0.361053	0.361053	0.361053	0.361053	0.361053	0.361053
cg12817959	22	SSTR3	37203420	37203421	0.606949	0.606949	0.606949	0.606949	0.606949	0.606949	0.606949	0.606949	0.606949	0.606949	0.606949	0.606949	0.606949	0.606949	0.606949	0.606949	0.606949	0.606949	0.606949
